# Supplementary material
Source: PubMed Central journal article supplement (PMC7241648)
Supplement: NIHMS1580882-supplement-12.pdf [file NIHMS1580882-supplement-12.pdf]

## Supplementary Materials:

Materials and Methods

Supplementary Text

Consortium Memberships

Figs. S1 to S40

Tables S1 to S53

Supplementary text files with detailed *cis*-eQTL results (n=4)

References (42–69)

## Extended Author list and Affiliations:

Nikolaos A Patsopoulos,<sup>1,4</sup> Sergio E Baranzini,<sup>5</sup> Adam Santaniello,<sup>5</sup> Parisa Shoostari,<sup>4,6-7</sup> Chris  
Cotsapas,<sup>4,6-7</sup> Garrett Wong,<sup>1,3</sup> Ashley H Beecham,<sup>8</sup> Tojo James,<sup>9</sup> Joseph Replogle,<sup>10</sup> Ioannis S  
Vlachos,<sup>1,3-4</sup> Cristin McCabe,<sup>4</sup> Tune H Pers,<sup>11</sup> Aaron Brandes,<sup>4</sup> Charles White,<sup>4,10</sup> Brendan  
Keenan,<sup>12</sup> Maria Cimpan,<sup>10</sup> Phoebe Winn,<sup>10</sup> Ioannis-Pavlos Panteliadis,<sup>1,4</sup> Allison Robbins,<sup>10</sup> Till  
FM Andlauer,<sup>13-15</sup> Onigiusz Zarzycki,<sup>1,4</sup> Bénédicte Dubois,<sup>16</sup> An Goris,<sup>16</sup> Helle Bach  
Søndergaard,<sup>17</sup> Finn Sellebjerg,<sup>17</sup> Per Soelberg Sorensen,<sup>17</sup> Henrik Ullum,<sup>18</sup> Lise Wegner  
Thoerner,<sup>18</sup> Janna Saarela,<sup>19</sup> Isabelle Cournu-Rebeix,<sup>20</sup> Vincent Damotte,<sup>20,21</sup> Bertrand Fontaine,<sup>20,</sup>  
<sup>22</sup> Lena Guillot-Noel,<sup>20</sup> Mark Lathrop,<sup>23-25</sup> Sandra Vukusic,<sup>26-28</sup> Achim Berthele,<sup>14-15</sup> Viola  
Pongratz,<sup>14-15</sup> Dorothea Buck,<sup>14-15</sup> Christiane Gasperi,<sup>14-15</sup> Christiane Graetz,<sup>15,29</sup> Verena  
Grummel,<sup>14-15</sup> Bernhard Hemmer,<sup>14-15,30</sup> Muni Hoshi,<sup>14-15</sup> Benjamin Knier,<sup>14-15</sup> Thomas Korn,<sup>14-</sup>  
<sup>15,30</sup> Christina M Lill,<sup>15,31-32</sup> Felix Luessi,<sup>15,31</sup> Mark Mühlau,<sup>14-15</sup> Frauke Zipp,<sup>15,31</sup> Efthimios  
Dardiotis,<sup>33</sup> Cristina Agliardi,<sup>34</sup> Antonio Amoroso,<sup>35</sup> Nadia Barizzone,<sup>36</sup> Maria D Benedetti,<sup>37-38</sup>  
Luisa Bernardinelli,<sup>39</sup> Paola Cavalla,<sup>40</sup> Ferdinando Clarelli,<sup>41</sup> Giancarlo Comi,<sup>41-42</sup> Daniele Cusi,<sup>43</sup>  
Federica Esposito,<sup>41,44</sup> Laura Ferrè,<sup>44</sup> Daniela Galimberti,<sup>45-46</sup> Clara Guaschino,<sup>41,44</sup> Maurizio A  
Leone,<sup>47</sup> Vittorio Martinelli,<sup>44</sup> Lucia Moiola,<sup>44</sup> Marco Salvetti,<sup>48-49</sup> Melissa Sorosina,<sup>41</sup> Domizia  
Vecchio,<sup>50</sup> Andrea Zauli,<sup>41</sup> Silvia Santoro,<sup>41</sup> Nicasio Mancini,<sup>51</sup> Miriam Zuccalà,<sup>52</sup> Julia

Mescheriakova,<sup>53</sup> Cornelia van Duijn,<sup>53-54</sup> Steffan D Bos,<sup>55</sup> Elisabeth G Celius,<sup>55-56</sup> Anne Spurkland,<sup>57</sup> Manuel Comabella,<sup>58</sup> Xavier Montalban,<sup>58</sup> Lars Alfredsson,<sup>59</sup> Izaura L Bomfim,<sup>60</sup> David Gomez-Cabrero,<sup>60</sup> Jan Hillert,<sup>60</sup> Maja Jagodic,<sup>60</sup> Magdalena Lindén,<sup>60</sup> Fredrik Piehl,<sup>60</sup> Ilijas Jelčić,<sup>61-62</sup> Roland Martin,<sup>61-62</sup> Mirela Sospedra,<sup>61-62</sup> Amie Baker,<sup>63</sup> Maria Ban,<sup>64</sup> Clive Hawkins,<sup>64</sup> Pirro Hysi,<sup>65</sup> Seema Kalra,<sup>66</sup> Fredrik Karpe,<sup>66</sup> Jyoti Khadake,<sup>67</sup> Genevieve Lachance,<sup>65</sup> Paul Molyneux,<sup>65</sup> Matthew Neville,<sup>66</sup> John Thorpe,<sup>68</sup> Elizabeth Bradshaw,<sup>10</sup> Stacy J Caillier,<sup>5</sup> Peter Calabresi,<sup>69</sup> Bruce AC Cree,<sup>5</sup> Anne Cross,<sup>70</sup> Mary Davis,<sup>71</sup> Paul WI de Bakker,<sup>2-4†</sup> Silvia Delgado,<sup>72</sup> Marieme Dembele,<sup>69</sup> Keith Edwards,<sup>73</sup> Kate Fitzgerald,<sup>69</sup> Irene Y Frohlich,<sup>10</sup> Pierre-Antoine Gourraud,<sup>5,74</sup> Jonathan L Haines,<sup>75</sup> Hakon Hakonarson,<sup>76-77</sup> Dorlan Kimbrough,<sup>78</sup> Noriko Isobe,<sup>5,79</sup> Ioanna Konidari,<sup>8</sup> Ellen Lathi,<sup>80</sup> Michelle H Lee,<sup>10</sup> Taibo Li,<sup>81</sup> David An,<sup>81</sup> Andrew Zimmer,<sup>81</sup> Lohith Madireddy,<sup>5</sup> Clara P Manrique,<sup>8</sup> Mitja Mitrovic,<sup>4,6-7</sup> Marta Olah,<sup>10</sup> Ellis Patrick,<sup>10,82-83</sup> Margaret A Pericak-Vance,<sup>8</sup> Laura Piccio,<sup>69</sup> Cathy Schaefer,<sup>84</sup> Howard Weiner,<sup>85</sup> Kasper Lage,<sup>80</sup> ANZgene, IIBDGC, WTCCC2, Alastair Compston,<sup>62</sup> David Hafler,<sup>4,86</sup> Hanne F Harbo,<sup>54-55</sup> Stephen L Hauser,<sup>5</sup> Graeme Stewart,<sup>87</sup> Sandra D'Alfonso,<sup>88</sup> Georgios Hadjigeorgiou,<sup>33</sup> Bruce Taylor,<sup>89</sup> Lisa F Barcellos,<sup>90</sup> David Booth,<sup>91</sup> Rogier Hintzen,<sup>92</sup> Ingrid Kockum,<sup>9</sup> Filippo Martinelli-Boneschi,<sup>41-42</sup> Jacob L McCauley,<sup>8</sup> Jorge R Oksenberg,<sup>5</sup> Annette Oturai,<sup>16</sup> Stephen Sawcer,<sup>62</sup> Adrian J Ivinson,<sup>93</sup> Tomas Olsson,<sup>9</sup> Philip L De Jager,<sup>4,10</sup>

1. Systems Biology and Computer Science Program, Ann Romney Center for Neurological Diseases, Department of Neurology, Brigham & Women's Hospital, Boston, 02115 MA, USA
2. Division of Genetics, Department of Medicine, Brigham & Women's Hospital, Harvard Medical School, Boston, MA, USA.
3. Harvard Medical School, Boston, MA 02115, USA.
4. Broad Institute of Harvard and Massachusetts Institute of Technology, Cambridge, MA, USA
5. Department of Neurology, University of California at San Francisco, Sandler Neurosciences Center, 675 Nelson Rising Lane, San Francisco, CA 94158, USA.

6. Department of Neurology, Yale University School of Medicine, New Haven, CT 06520, USA
7. Department of Genetics, Yale School of Medicine, New Haven, CT 06520, USA.
8. John P. Hussman Institute for Human Genomics, University of Miami, Miller School of Medicine, Miami, FL 33136, USA.
9. Department of Clinical Neuroscience, Karolinska Institutet, Stockholm, Sweden.
10. Center for Translational & Computational Neuroimmunology, Multiple Sclerosis Center, Department of Neurology, Columbia University Medical Center, New York, NY, USA.
11. The Novo Nordisk Foundation Center for Basic Metabolic Research, Faculty of Health and Medical Sciences, University of Copenhagen, Copenhagen, 2100, Denmark.
12. Center for Sleep and Circadian Neurobiology, University of Pennsylvania Perelman School of Medicine, Philadelphia, PA.
13. Max Planck Institute of Psychiatry, 80804 Munich, Germany.
14. Department of Neurology, Klinikum rechts der Isar, Technical University of Munich, 81675 Munich, Germany.
15. German competence network for multiple sclerosis.
16. KU Leuven Department of Neurosciences, Laboratory for Neuroimmunology, Herestraat 49 bus 1022, 3000 Leuven, Belgium.
17. Danish Multiple Sclerosis Center, Department of Neurology, Rigshospitalet, University of Copenhagen, Section 6311, 2100 Copenhagen, Denmark.
18. Department of Clinical Immunology, Rigshospitalet, University of Copenhagen, Section 2082, 2100 Copenhagen, Denmark.
19. Institute for Molecular Medicine Finland, University of Helsinki, Helsinki, Finland.
20. ICM-UMR 1127, INSERM, Sorbonne University, Hôpital Universitaire Pitié-Salpêtrière 47 Boulevard de l'Hôpital, F-75013 Paris.
21. UMR1167 Université de Lille, Inserm, CHU Lille, Institut Pasteur de Lille.

22. CRM-UMR974 Department of Neurology Hôpital Universitaire Pitié-Salpêtrière 47 Boulevard de l'Hôpital F-75013 Paris.
23. Commissariat à l'Energie Atomique, Institut Genomique, Centre National de Génotypage, Evry, France.
24. Fondation Jean Dausset - Centre d'Etude du Polymorphisme Humain, Paris, France.
25. McGill University and Genome Quebec Innovation Center, Montreal, Canada.
26. Hospices Civils de Lyon, Service de Neurologie, sclérose en plaques, pathologies de la myéline et neuro-inflammation, F-69677 Bron, France.
27. Observatoire Français de la Sclérose en Plaques, Centre de Recherche en Neurosciences de Lyon, INSERM 1028 et CNRS UMR 5292, F-69003 Lyon, France.
28. Université de Lyon, Université Claude Bernard Lyon 1, F-69000 Lyon, France; Eugène Devic EDMUS Foundation against multiple sclerosis, F-69677 Bron, France.
29. Focus Program Translational Neuroscience (FTN), Rhine Main Neuroscience Network (rmn2), Johannes Gutenberg University-Medical Center, Mainz, Germany.
30. Munich Cluster for Systems Neurology (SyNergy), 81377 Munich, Germany.
31. Department of Neurology, Focus Program Translational Neuroscience (FTN), and Immunology (FZI), Rhine-Main Neuroscience Network (rmn2), University Medical Center of the Johannes Gutenberg University Mainz, Mainz, Germany.
32. Genetic and Molecular Epidemiology Group, Institute of Neurogenetics, University of Luebeck, Luebeck, Germany.
33. Neurology Dpt, Neurogenetics Lab, University Hospital of Larissa, Greece.
34. Laboratory of Molecular Medicine and Biotechnology, Don C. Gnocchi Foundation ONLUS, IRCCS S. Maria Nascente, Milan, Italy.
35. Department of Medical Sciences, Torino University, Turin, Italy.
36. Department of Health Sciences and Interdisciplinary Research Center of Autoimmune Diseases (IRCAD), University of Eastern Piedmont, Novara, Italy.

37. Centro Regionale Sclerosi Multipla, Neurologia B, AOUI Verona, Italy.
38. Fondazione IRCCS Cà Granda, Ospedale Maggiore Policlinico, Italy.
39. Medical Research Council Biostatistics Unit, Robinson Way, Cambridge CB2 0SR, UK.
40. MS Center, Department of Neuroscience, A.O. Città della Salute e della Scienza di Torino & University of Turin, Torino, Italy.
41. Laboratory of Human Genetics of Neurological complex disorder, Institute of Experimental Neurology (INSPE), Division of Neuroscience, San Raffaele Scientific Institute, Via Olgettina 58, 20132, Milan, Italy.
42. Department of Biomedical Sciences for Health, University of Milan, Milan, Italy.
43. University of Milan, Department of Health Sciences, San Paolo Hospital and Filarete Foundation, viale Ortles 22/4, 20139 Milan, Italy.
44. Department of Neurology, Institute of Experimental Neurology (INSPE), Division of Neuroscience, San Raffaele Scientific Institute, Via Olgettina 58, 20132, Milan, Italy.
45. Neurology Unit, Dept. of Pathophysiology and Transplantation, University of Milan, , Dino Ferrari Center, Milan, Italy.
46. Fondazione IRCCS Ca' Granda, Ospedale Policlinico, Milan, Italy.
47. Fondazione IRCCS Casa Sollievo della Sofferenza, Unit of Neurology, San Giovanni Rotondo (FG), Italy.
48. Center for Experimental Neurological Therapy (CENTERS), Neurology and Department of Neurosciences, Mental Health and Sensory Organs, Università La Sapienza, Roma, Italy.
49. IRCCS Istituto Neurologico Mediterraneo (INM) Neuromed, Pozzilli, Italy.
50. Department of Neurology, Ospedale Maggiore, Novara, Italy.
51. Laboratory of Microbiology and Virology, University Vita-Salute San Raffaele, Hospital San Raffaele, Milan, Italy.
52. Department of Health Sciences and Interdisciplinary Research Center of Autoimmune Diseases (IRCAD), University of Eastern Piedmont, Novara, Italy.

53. Department of Neurology, Erasmus MC, Rotterdam, Netherlands.
54. Nuffield Department of Population Health, Big Data Institute, University of Oxford, Li Ka Shing Centre for Health Information and Discovery, Old Road Campus, Oxford OX3 7LF, UK.
55. Department of Neurology, Institute of Clinical Medicine, University of Oslo, Norway.
56. Department of Neurology, Oslo University Hospital, Oslo, Norway.
57. Institute of Basic Medical Sciences, University of Oslo, Oslo, Norway.
58. Servei de Neurologia-Neuroimmunologia, Centre d'Esclerosi Múltiple de Catalunya (Cemcat), Institut de Recerca Vall d'Hebron (VHIR), Hospital Universitari Vall d'Hebron, Spain.
59. Institute of Environmental Medicine, Karolinska Institutet, Stockholm, Sweden.
60. Department of Clinical Neuroscience, Karolinska Institutet, Stockholm, Sweden.
61. Neuroimmunology and MS Research (nims), Neurology Clinic, University Hospital Zurich, Frauenklinikstrasse 26, 8091 Zurich, Switzerland .
62. Department of Neuroimmunology and MS Research, Neurology Clinic, University Hospital Zürich, Frauenklinikstrasse 26, 8091 Zürich, Switzerland.
63. University of Cambridge, Department of Clinical Neurosciences, Addenbrooke's Hospital, BOX 165, Hills Road, Cambridge CB2 0QQ, UK.
64. Keele University Medical School, University Hospital of North Staffordshire, Stoke-on-Trent ST4 7NY, UK.
65. Department of Twin Research and Genetic Epidemiology, King's College London, London, SE1 7EH, UK.
66. NIHR Oxford Biomedical Research Centre, Diabetes and Metabolism Theme, OCDEM, Churchill Hospital, Oxford UK.
67. NIHR BioResource, Box 299, University of Cambridge and Cambridge University Hospitals NHS Foundation Trust Hills Road, Cambridge CB2 0QQ, UK.
68. Department of Neurology, Peterborough City Hospital, Edith Cavell Campus, Bretton Gate, Peterborough PE3 9GZ, UK.

69. Department of Neurology, Johns Hopkins University School of medicine, Baltimore MD.
70. Multiple sclerosis center, Department of neurology, School of medicine, Washington University St Louis, St Louis MO.
71. Center for Human Genetics Research, Vanderbilt University Medical Center, 525 Light Hall, 2215 Garland Avenue, Nashville, TN 37232, USA.
72. Multiple Sclerosis Division, Department of Neurology, University of Miami, Miller School of Medicine, Miami, FL 33136, USA.
73. MS Center of Northeastern NY 1205 Troy Schenectady Rd, Latham, NY 12110.
74. Université de Nantes, INSERM, Centre de Recherche en Transplantation et Immunologie, UMR 1064, ATIP-Avenir, Equipe 5, Nantes, France.
75. Population & Quantitative Health Sciences, Department of Epidemiology and Biostatistics, Case Western Reserve University, 10900 Euclid Avenue, Cleveland, OH 44106-4945 USA.
76. Center for Applied Genomics, The Children's Hospital of Philadelphia, 3615 Civic Center Blvd., Philadelphia, PA 19104, USA.
77. Department of Pediatrics, The Perelman School of Medicine, University of Pennsylvania, Philadelphia PA, USA.
78. Department of Neurology, Brigham & Women's Hospital, Boston, 02115 MA, USA.
79. Departments of Neurology and Neurological Therapeutics, Neurological Institute, Graduate School of Medical Sciences, Kyushu University, 3-1-1 Maidashi, Higashi-ku, Fukuoka City, Fukuoka 812-8582 Japan.
80. The Elliot Lewis Center, 110 Cedar St, Wellesley MA, 02481, USA.
81. Broad Institute of Harvard University and MIT, Cambridge, 02142 MA, USA.
82. School of Mathematics and Statistics, University of Sydney, Sydney, NSW 2006, Australia
83. Westmead Institute for Medical Research, University of Sydney, Westmead, NSW 2145, Australia.
84. Kaiser Permanente Division of Research, Oakland, CA, USA.

85. Ann Romney Center for Neurological Diseases, Department of Neurology, Brigham & Women's Hospital, Boston, 02115 MA, USA.
86. Departments of Neurology and Immunobiology, Yale University School of Medicine, New Haven, CT 06520, USA.
87. Westmead Millennium Institute, University of Sydney, New South Wales, Australia.
88. Department of Health Sciences and Interdisciplinary Research Center of Autoimmune Diseases (IRCAD), University of Eastern Piedmont, Novara, Italy.
89. Menzies Research Institute Tasmania, University of Tasmania, Australia.
90. UC Berkeley School of Public Health and Center for Computational Biology, USA.
91. Westmead Millennium Institute, University of Sydney, New South Wales, Australia.
92. Department of Neurology and Department of Immunology, Erasmus MC, Rotterdam, Netherlands.
93. UK Dementia Research Institute, University College London, Gower Street, London WC1E 6BT, UK.

† Current address: Vertex Pharmaceuticals, 50 Northern Avenue, Boston, MA 02210, USA.

**Expanded list of group authorships (to not be included as individual authors)**

**ANZgene Membership**

Rodney J Scott <sup>1</sup>, Jeannette Lechner-Scott <sup>1</sup>, Rod Lea <sup>1</sup>, Pablo Moscato <sup>1</sup>, David R Booth <sup>2</sup>, Graeme J Stewart <sup>2</sup>, Stephen Vucic <sup>2</sup>, Grant Parnell <sup>2</sup>, Michael Barnett <sup>3</sup>, Deborah Mason <sup>4</sup>, Lyn Griffiths <sup>5</sup>, Simon Broadley <sup>6</sup>, Lotti Tajouri <sup>7</sup>, Alan Baxter <sup>8</sup>, Mark Slee <sup>9</sup>, Bruce V Taylor <sup>10</sup>, Jac Charlesworth <sup>10</sup>, Trevor J Kilpatrick <sup>11</sup>, Justin Rubio <sup>11</sup>, Vilija Jokubaitis <sup>12</sup>, James Wiley <sup>11</sup>,



Helmut Butzkueven <sup>12</sup>, Stephen Leslie <sup>11</sup>, Allan Motyer <sup>11</sup>, Jim Stankovich <sup>11</sup>, William M Carroll <sup>13</sup>, Allan G Kermode <sup>13</sup>, Marzena Pedrini <sup>13</sup>.

Hunter Medical Research Institute, University of Newcastle NSW Australia

1 Westmead Institute for Medical Research, University of Sydney NSW Australia

2 Brain and Mind Centre, University of Sydney NSW Australia

3 Canterbury District Health Board, Christchurch, New Zealand

4 Griffith Institute of Health and Medical Research, Griffith University, Gold Coast QLD Australia

5 School of Medicine, Griffith University, Gold Coast QLD Australia

6 Bond University, Gold Coast QLD Australia

7 James Cook University, Townsville, QLD Australia

8 Flinders University, SA Australia

9 Menzies Research Institute Tasmania, University of Tasmania Australia

10 University of Melbourne, VIC Australia

11 Monash University, VIC Australia

12 Sir Charles Gairdner Hospital, Perth, WA Australia

### **International IBD Genetics Consortium (IIBDGC) contributing members**

Murray Barclay<sup>1</sup>, Laurent Peyrin-Biroulet<sup>2</sup>, Mathias Chamaillard<sup>3</sup>, Jean-Frederick Colombe<sup>4</sup>, Mario Cottone<sup>5</sup>, Anthony Croft<sup>6</sup>, Renata D'Inca<sup>7</sup>, Jonas Halfvarson<sup>8,9</sup>, Katherine Hanigan<sup>6</sup>, Paul Henderson<sup>10,11</sup>, Jean-Pierre Hugot<sup>12,13</sup>, Amir Karban<sup>14</sup>, Nicholas A Kennedy<sup>15</sup>, Mohammed Azam Khan<sup>16</sup>, Marc Lémann<sup>17</sup>, Arie Levine<sup>18</sup>, Dunecan Massey<sup>19</sup>, Monica Milla<sup>20</sup>, Grant W Montgomery<sup>21</sup>, Sok Meng Evelyn Ng<sup>22</sup>, Ioannis Oikonomou<sup>22</sup>, Harald Peeters<sup>23</sup>, Deborah D. Proctor<sup>22</sup>, Jean-Francois Rahier<sup>24</sup>, Rebecca Roberts<sup>2</sup>, Paul Rutgeerts<sup>25</sup>, Frank Seibold<sup>26</sup>, Laura Stronati<sup>27</sup>, Kirstin M Taylor<sup>28</sup>, Leif Törkvist<sup>29</sup>, Kullak Ublick<sup>30</sup>, Johan Van Limbergen<sup>31</sup>, Andre

Van Gossum<sup>32</sup>, Morten H. Vatn<sup>33</sup>, Hu Zhang<sup>20</sup>, Wei Zhang<sup>22</sup>, Australia and New Zealand  
IBDGC\*, Belgium Genetic Consortium†, Initiative on Crohn and Colitis, NIDDK IBDGC‡, United Kingdom IBDGC, Wellcome Trust Case Control Consortium§

1 Department of Medicine, University of Otago, Christchurch, New Zealand.

2 Gastroenterology Unit, INSERM U954, Nancy University and Hospital, France.

3 INSERM, U1019, Lille, France.

4 Univ Lille Nord de France, CHU Lille and Lille-2 University, Gastroenterology Unit, France.

5 Division of Internal Medicine, Villa Sofia-V. Cervello Hospital, University of Palermo, Palermo, Italy.

6 Inflammatory Bowel Diseases, Genetic Epidemiology, Queensland Institute of Medical Research, Brisbane, Australia.

7 Department of Surgical and Gastroenterological Sciences, University of Padua, Padua, Italy.

8 Department of Medicine, Örebro University Hospital, Örebro, Sweden.

9 School of Health and Medical Sciences, Örebro University, Örebro, Sweden.

10 Royal Hospital for Sick Children, Paediatric Gastroenterology and Nutrition, Edinburgh, UK.

11 Child Life and Health, University of Edinburgh, Edinburgh, UK.

12 INSERM U843, Paris, France.

13 Univ-Paris Diderot Sorbonne Paris-Cité, Paris France.

14 Department of Gastroenterology, Faculty of Medicine, Technion-Israel Institute of Technology, Haifa, Israel.

15 Gastrointestinal Unit, Institute of Genetics and Molecular Medicine, University of Edinburgh, Edinburgh, UK.

16 Genetic Medicine, MAHSC, University of Manchester, Manchester, UK.

17 Université Paris Diderot, GETAID group, Paris, France.

18 Pediatric Gastroenterology Unit, Wolfson Medical Center and Sackler School of Medicine, Tel Aviv University, Tel Aviv, Israel.

19 Inflammatory Bowel Disease Research Group, Addenbrooke's Hospital, University of Cambridge, Cambridge, UK.

20 Azienda Ospedaliero Universitaria (AOU) Careggi, Unit of Gastroenterology SOD2, Florence, Italy.

21 Molecular Epidemiology, Queensland Institute of Medical Research, Brisbane, Australia.

22 Department of Internal Medicine, Section of Digestive Diseases, Yale School of Medicine, New Haven, Connecticut, USA.

23 Dept Gastroenterology - University hospital Gent - De Pintelaan - 9000 Gent Belgium.

24 Dept Gastroenterology - UCL Mont Godinne Belgium.

25 Division of Gastroenterology, University Hospital Gasthuisberg, Leuven, Belgium.

26 University of Bern, Division of Gastroenterology, Inselspital, Bern,

## **Membership of Wellcome Trust Case Control Consortium 2 (WTCCC2)**

### Management Committee

Peter Donnelly (Chair)<sup>1,2</sup>, Ines Barroso (Deputy Chair)<sup>3</sup>, Jenefer M Blackwell<sup>4,5</sup>, Elvira Bramon<sup>6</sup>, Matthew A Brown<sup>7</sup>, Juan P Casas<sup>8</sup>, Aiden Corvin<sup>9</sup>, Panos Deloukas<sup>3</sup>, Audrey Duncanson<sup>10</sup>, Janusz Jankowski<sup>11</sup>, Hugh S Markus<sup>12</sup>, Christopher G Mathew<sup>13</sup>, Colin NA Palmer<sup>14</sup>, Robert Plomin<sup>15</sup>, Anna Rautanen<sup>1</sup>, Stephen J Sawcer<sup>16</sup>, Richard C Trembath<sup>13</sup>, Ananth C Viswanathan<sup>17</sup>, Nicholas W Wood<sup>18</sup>

### Data and Analysis Group

Chris C A Spencer<sup>1</sup>, Gavin Band<sup>1</sup>, Céline Bellenguez<sup>1</sup>, Colin Freeman<sup>1</sup>, Garrett Hellenthal<sup>1</sup>, Eleni Giannoulatou<sup>1</sup>, Matti Pirinen<sup>1</sup>, Richard Pearson<sup>1</sup>, Amy Strange<sup>1</sup>, Zhan Su<sup>1</sup>, Damjan Vukcevic<sup>1</sup>, Peter Donnelly<sup>1,2</sup>

### DNA, Genotyping, Data QC and Informatics Group

Cordelia Langford<sup>3</sup>, Sarah E Hunt<sup>3</sup>, Sarah Edkins<sup>3</sup>, Rhian Gwilliam<sup>3</sup>, Hannah Blackburn<sup>3</sup>, Suzannah J Bumpstead<sup>3</sup>, Serge Dronov<sup>3</sup>, Matthew Gillman<sup>3</sup>, Emma Gray<sup>3</sup>, Naomi Hammond<sup>3</sup>, Alagurevathi Jayakumar<sup>3</sup>, Owen T McCann<sup>3</sup>, Jennifer Liddle<sup>3</sup>, Simon C Potter<sup>3</sup>, Radhi Ravindrarah<sup>3</sup>, Michelle Ricketts<sup>3</sup>, Matthew Waller<sup>3</sup>, Paul Weston<sup>3</sup>, Sara Widaa<sup>3</sup>, Pamela Whittaker<sup>3</sup>, Ines Barroso<sup>3</sup>, Panos Deloukas<sup>3</sup>.

Publications Committee

Christopher G Mathew (Chair)<sup>13</sup>, Jenefer M Blackwell<sup>4,5</sup>, Matthew A Brown<sup>7</sup>, Aiden Corvin<sup>9</sup>, Chris C A Spencer<sup>1</sup>

1 Wellcome Trust Centre for Human Genetics, University of Oxford, Roosevelt Drive, Oxford OX3 7BN, UK; 2 Dept Statistics, University of Oxford, Oxford OX1 3TG, UK; 3 Wellcome Trust Sanger Institute, Wellcome Trust Genome Campus, Hinxton, Cambridge CB10 1SA, UK; 4 Telethon Institute for Child Health Research, Centre for Child Health Research, University of Western Australia, 100 Roberts Road, Subiaco, Western Australia 6008; 5 Cambridge Institute for Medical Research, University of Cambridge School of Clinical Medicine, Cambridge CB2 0XY, UK; 6 Department of Psychosis Studies, NIHR Biomedical Research Centre for Mental Health at the Institute of Psychiatry, King's College London and The South London and Maudsley NHS Foundation Trust, Denmark Hill, London SE5 8AF, UK; 7 University of Queensland Diamantina Institute, Brisbane, Queensland, Australia; 8 Dept Epidemiology and Population Health, London School of Hygiene and Tropical Medicine, London WC1E 7HT and Dept Epidemiology and Public Health, University College London WC1E 6BT, UK; 9 Neuropsychiatric Genetics Research Group, Institute of Molecular Medicine,

Trinity College Dublin, Dublin 2, Eire; 10 Molecular and Physiological Sciences, The Wellcome Trust, London NW1 2BE; 11 Department of Oncology, Old Road Campus, University of Oxford, Oxford OX3 7DQ, UK , Digestive Diseases Centre, Leicester Royal Infirmary, Leicester LE7 7HH, UK and Centre for Digestive Diseases, Queen Mary University of London, London E1 2AD, UK; 12 Clinical Neurosciences, St George's University of London, London SW17 0RE; 13 King's College London Dept Medical and Molecular Genetics, King's Health Partners, Guy's Hospital, London SE1 9RT, UK; 14 Biomedical Research Centre, Ninewells Hospital and Medical School, Dundee DD1 9SY, UK; 15 King's College London Social, Genetic and Developmental Psychiatry Centre, Institute of Psychiatry, Denmark Hill, London SE5 8AF, UK; 16 University of Cambridge Dept Clinical Neurosciences, Addenbrooke's Hospital, Cambridge CB2 0QQ, UK; 17 NIHR Biomedical Research Centre for Ophthalmology, Moorfields Eye Hospital NHS Foundation Trust and UCL Institute of Ophthalmology, London EC1V 2PD, UK; 18 Dept Molecular Neuroscience, Institute of Neurology, Queen Square, London WC1N 3BG, UK.
